# Supplementary material for: Strain differences between C57Bl/6 and DBA/2 mice (Mus musculus) in delayed matching and nonmatching-to-position tasks: impact of sample responses and delay intervals
Source: PeerJ journal article supplement (doi:10.7717/peerj.19200), 2025-03-24

Strain Differences Between C57Bl/6 and DBA/2 Mice (*Mus musculus*) in Delayed Matching and Nonmatching-to-Position Tasks: Impact of Sample Responses and Delay Intervals

Kazuhiro Goto

Supplementary materials

**Fig 1S.** Individual data from DNMTPT test with variable delay intervals. The horizontal axis represents the ratio of target to distractor luminance. Group data are shown in figure 3(B).

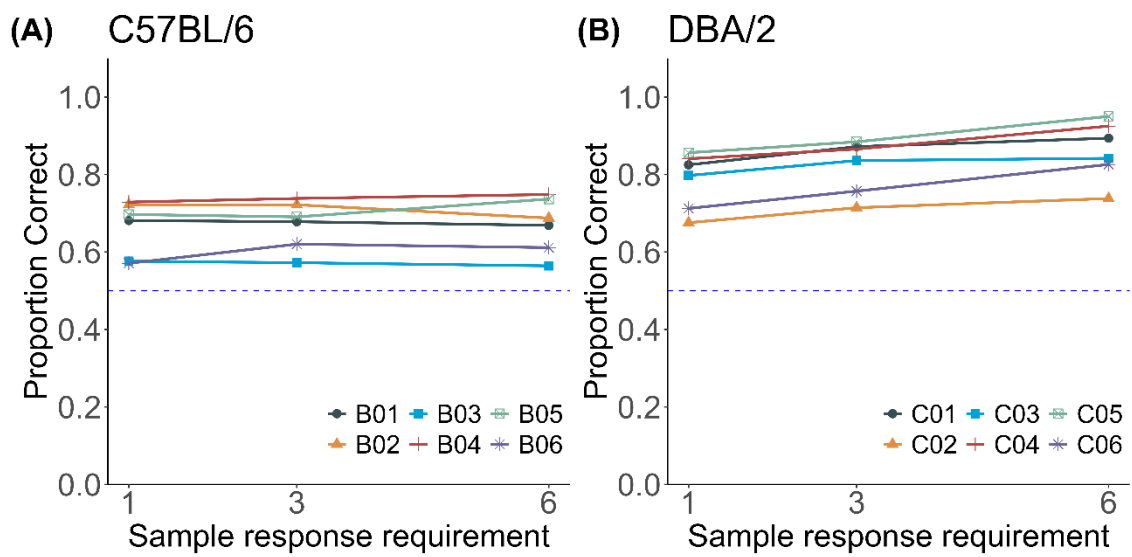

**Fig 2S.** Individual data from DMTP test with variable delay intervals. The horizontal axis represents the ratio of target to distractor luminance. Group data are shown in figure 3(C).

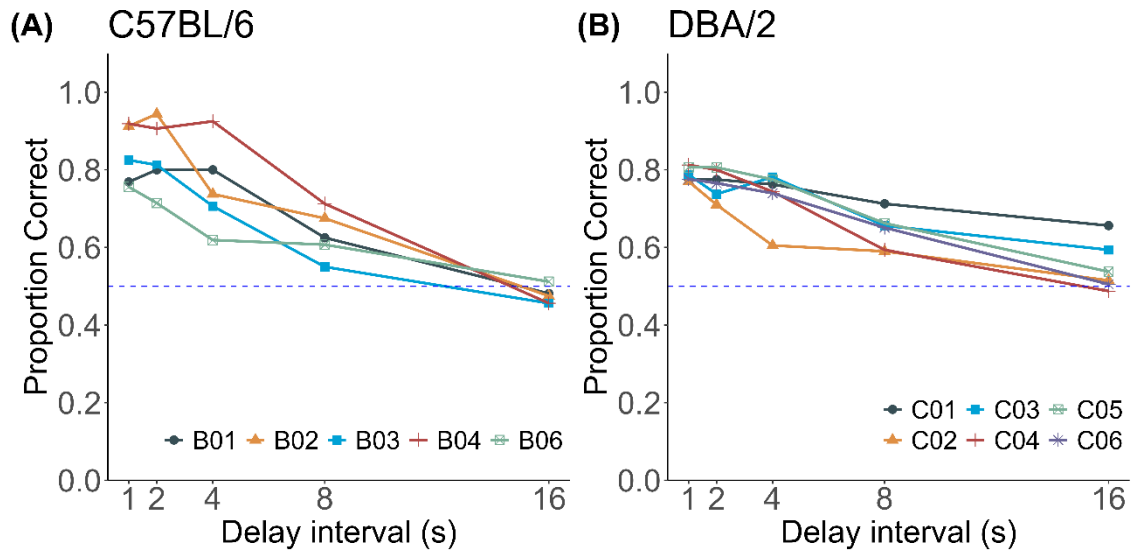

**Fig3S.** Individual data from DNMTF test with variable sample responses. The horizontal axis represents the ratio of target to distractor luminance. Group data are shown in figure 4(B).

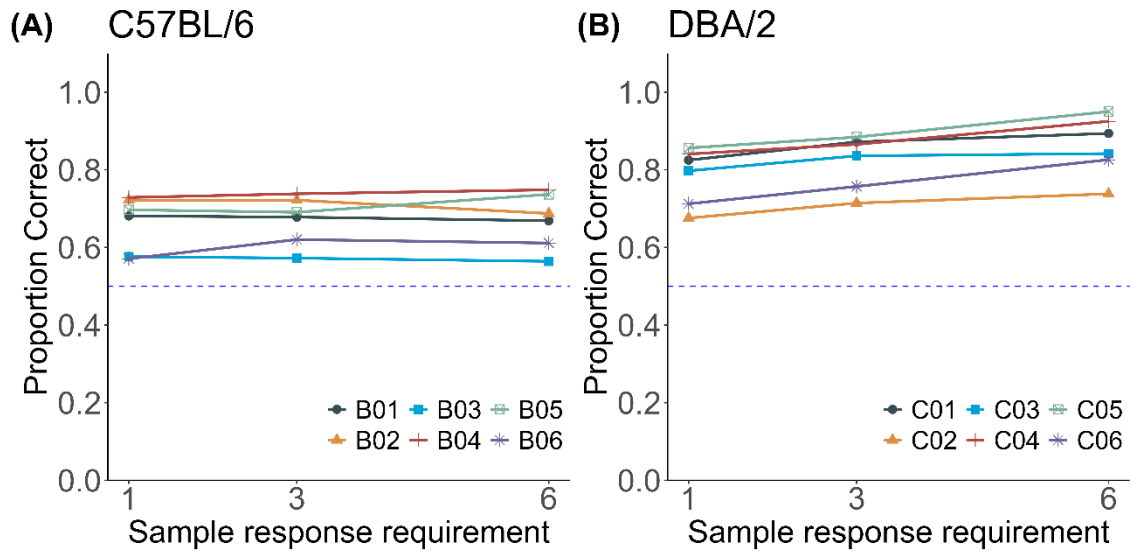

**Fig4S.** Individual data from DMTP test with variable sample responses. The horizontal axis represents the ratio of target to distractor luminance. Group data are shown in figure 4(C).

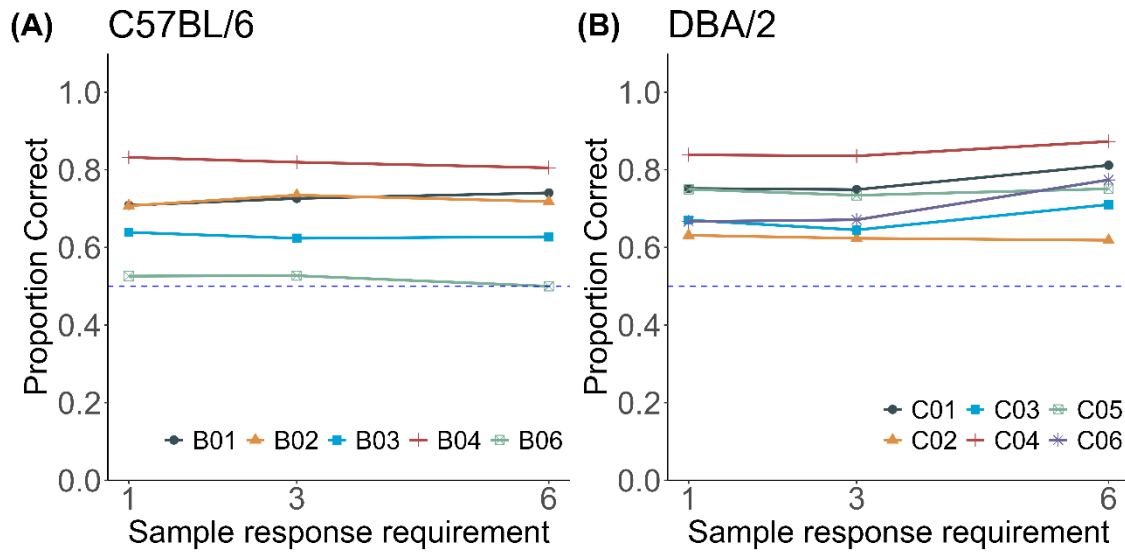

Supplement: GotoESM.pdf [file GotoESM.pdf]
